# Supplementary material for: Comparison of Drying Techniques for Extraction of Bioactive Compounds from Olive-Tree Materials
Source: MDPI journal article supplement (doi:10.3390/foods12142684), 2023-07-12
Supplement: s1 [file s1]

**Supplementary Table S1.** Parameters for identification of bioactive compounds in olive-tree materials.

| Compound name                     | R <sub>t</sub> | Formula                                         | Precursor ion<br>( <i>m/z</i> ) | Main product ions<br>( <i>m/z</i> ) | Priority samples        |
|-----------------------------------|----------------|-------------------------------------------------|---------------------------------|-------------------------------------|-------------------------|
| <b>Secoiridoids</b>               |                |                                                 |                                 |                                     |                         |
| Oleuropein <sup>a</sup>           | 12.15          | C <sub>25</sub> H <sub>32</sub> O <sub>13</sub> | 539.176                         | 507.2762; 225.0747; 112.9845        | Leaves                  |
| Oleuropein glucoside              | 11.37          | C <sub>31</sub> H <sub>42</sub> O <sub>18</sub> | 701.2285                        | 539.1776; 275.0893; 153.0529        | Leaves                  |
| Oleuropein quinone                | 12.41          | C <sub>25</sub> H <sub>30</sub> O <sub>13</sub> | 537.1612                        | 223.0601; 151.0396; 110.1298        | Leaves                  |
| Ligstroside                       | 13.05          | C <sub>25</sub> H <sub>32</sub> O <sub>12</sub> | 523.1813                        | 291.0846; 259.0948; 137.0594        | Leaves and olive pomace |
| Hydroxyoleuropein                 | 10.70          | C <sub>25</sub> H <sub>32</sub> O <sub>14</sub> | 555.1709                        | 537.1597; 291.0864; 151.0380        | Leaves                  |
| Oleacein <sup>a</sup>             | 12.39          | C <sub>17</sub> H <sub>20</sub> O <sub>6</sub>  | 319.1175                        | 153.0440; 69.0341; 59.0129          | Leaves and olive pomace |
| Oleaceinic acid                   | 10.49          | C <sub>17</sub> H <sub>19</sub> O <sub>7</sub>  | 335.1113                        | 199.0631; 181.0715; 151.0385        | Olive pomace            |
| Oleocanthal <sup>a</sup>          | 13.49          | C <sub>17</sub> H <sub>20</sub> O <sub>5</sub>  | 303.1228                        | 181.0051; 137.0585; 69.0331         | Olive pomace            |
| Oleocanthalic acid                | 12.61          | C <sub>17</sub> H <sub>20</sub> O <sub>6</sub>  | 319.1185                        | 183.0654; 139.0745; 69.0343         | Olive pomace            |
| Oleuropein aglycone <sup>a</sup>  | 14.11          | C <sub>19</sub> H <sub>22</sub> O <sub>8</sub>  | 377.1233                        | 275.0556; 153.0494; 59.0128         | Leaves                  |
| Oleuropein aglycone quinone       | 14.01          | C <sub>19</sub> H <sub>20</sub> O <sub>8</sub>  | 375.1095                        | 275.0553; 153.0560; 59.0128         | Olive pomace            |
| Ligstroside aglycone <sup>a</sup> | 14.59          | C <sub>19</sub> H <sub>22</sub> O <sub>7</sub>  | 361.1282                        | 291.0870; 139.0402; 111.0072        | Olive pomace            |
| 2-methoxyoleuropein               | 12.48          | C <sub>26</sub> H <sub>34</sub> O <sub>14</sub> | 569.1874                        | 537.1590; 403.1233; 151.0386        | Olive pomace            |
| Demethyloleuropein aglycon        | 12.93          | C <sub>18</sub> H <sub>20</sub> O <sub>8</sub>  | 363.1085                        | 229.1074; 121.0666; 59.0123         | Leaves                  |
| Hydroxyoleuropein aglycon         | 12.27          | C <sub>19</sub> H <sub>22</sub> O <sub>9</sub>  | 393.1182                        | 291.0503; 151.0399; 62.9845         | Olive pomace            |
| GL3 <sup>a</sup>                  | 12.14          | C <sub>48</sub> H <sub>64</sub> O <sub>27</sub> | 1071.356                        | 909.3060; 685.2386; 101.0248        | Olive pomace            |
| Nuzhenide <sup>a</sup>            | 12.81          | C <sub>31</sub> H <sub>42</sub> O <sub>17</sub> | 685.2338                        | 685.2447; 453.1346; 101.0232        | Olive pomace            |

|                                                          |       |                                                 |          |                              |                                |
|----------------------------------------------------------|-------|-------------------------------------------------|----------|------------------------------|--------------------------------|
| Hydroxylated form of decarboxymethyl oleuropein aglycone | 10.49 | C <sub>17</sub> H <sub>20</sub> O <sub>7</sub>  | 335.1124 | 202.9119; 151.03770; 69.0350 | Olive pomace                   |
| <b>Simple phenols</b>                                    |       |                                                 |          |                              |                                |
| 3-methylcatechol <sup>a</sup>                            | 9.42  | C <sub>7</sub> H <sub>8</sub> O <sub>2</sub>    | 123.0441 | 95.0479; 69.0329; 41.0015    | Leaves and olive pomace        |
| Hydroxytyrosol <sup>a</sup>                              | 9.43  | C <sub>8</sub> H <sub>10</sub> O <sub>3</sub>   | 153.0544 | 123.0444; 93.0329; 44.9976   | Leaves and olive pomace        |
| Hydroxytyrosol glucoside                                 | 8.89  | C <sub>14</sub> H <sub>20</sub> O <sub>8</sub>  | 315.1072 | 153.0537; 123.0442; 59.0129  | Olive pomace and leaves        |
| Hydroxytyrosol-lathyroside                               | 8.99  | C <sub>19</sub> H <sub>28</sub> O <sub>12</sub> | 447.1491 | 315.888; 153.0548; 44.9976   | Leaves and olive pomace        |
| Tyrosol acetate                                          | 10.48 | C <sub>10</sub> H <sub>12</sub> O <sub>3</sub>  | 179.0705 | 137.3739; 123.0421; 68.9950  | Olive pomace and olive         |
| <b>Flavonoids</b>                                        |       |                                                 |          |                              |                                |
| Apigenin <sup>a</sup>                                    | 14.49 | C <sub>15</sub> H <sub>10</sub> O <sub>5</sub>  | 269.0441 | 225.0538; 151.0028; 117.0333 | Leaves                         |
| Luteolin <sup>a</sup>                                    | 13.92 | C <sub>15</sub> H <sub>10</sub> O <sub>6</sub>  | 285.0395 | 199.0389; 175.0396; 151.0033 | Leaves                         |
| Luteolin-7-O-glucoside <sup>a</sup>                      | 12.69 | C <sub>21</sub> H <sub>20</sub> O <sub>11</sub> | 447.0921 | 327.0486; 285.0405; 167.0329 | Leaves                         |
| Luteolin-7-rutinoside <sup>a</sup>                       | 10.90 | C <sub>27</sub> H <sub>30</sub> O <sub>15</sub> | 593.1505 | 285.0402; 151.9935; 137.8169 | Leaves                         |
| Quercitrin <sup>a</sup>                                  | 12.26 | C <sub>21</sub> H <sub>20</sub> O <sub>11</sub> | 447.0920 | 300.0264; 254.9830; 151.0364 | Leaves                         |
| Quercetin-3-glucoside <sup>a</sup>                       | 11.46 | C <sub>21</sub> H <sub>20</sub> O <sub>12</sub> | 463.0875 | 424.4496; 300.0259; 190.9303 | Leaves                         |
| Rhoifolin <sup>a</sup>                                   | 11.54 | C <sub>27</sub> H <sub>30</sub> O <sub>14</sub> | 577.1526 | 269.0449; 151.0037; 112.9837 | Leaves                         |
| Rutin <sup>a</sup>                                       | 11.14 | C <sub>27</sub> H <sub>30</sub> O <sub>16</sub> | 609.1456 | 385.1314; 301.0322; 151.0041 | Leaves                         |
| <b>Triterpenes</b>                                       |       |                                                 |          |                              |                                |
| Maslinic acid <sup>a</sup>                               | 16.67 | C <sub>30</sub> H <sub>48</sub> O <sub>4</sub>  | 471.3469 | 392.9793; 266.9875; 118.9934 | Olive pomace, leaves and olive |
| Oleanolic acid                                           | 17.51 | C <sub>30</sub> H <sub>48</sub> O <sub>3</sub>  | 455.3524 | 396.9865; 187.0260; 112.9804 | Leaves                         |

R<sub>t</sub>, Retention time.

<sup>a</sup>Confirmed by analytical standard.
